# Supplementary material for: High-performance perovskite memristor based on methyl ammonium lead halides
Source: Royal Society of Chemistry journal article supplement (doi:10.1039/c6tc00141f), 2016-01-01
Supplement: c6tc00141f1.pdf [file c6tc00141f1.pdf]

## Supporting information

### High-Performance Perovskite Memristor Based on Methyl Ammonium Lead Halides

*Kai Yan, Ming Peng, Xiao Yu, Xin Cai, Si Chen, Hsienwei Hu, Buxin Chen, Xue Gao, Bin Dong,  
Dechun Zou\**

#### *I-V* characteristics of the device with an inert metal electrode

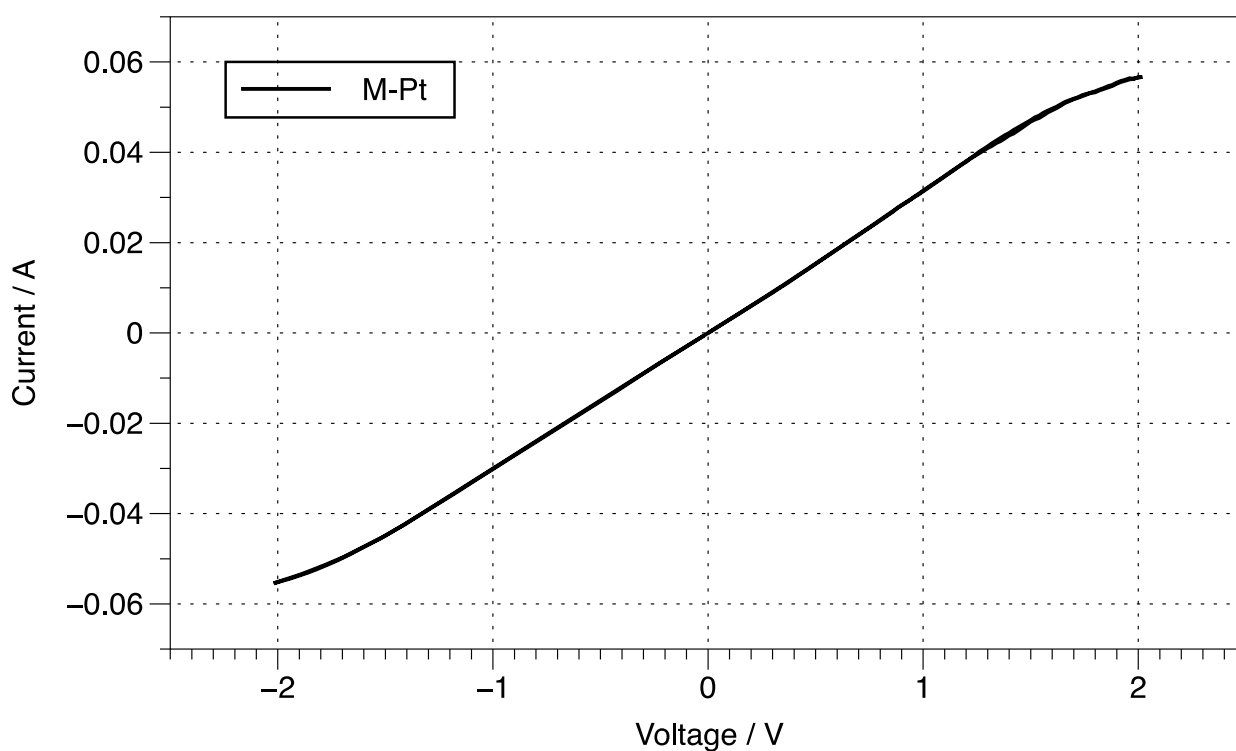

**Figure S1.** *I-V* characteristics test of FTO/CH<sub>3</sub>NH<sub>3</sub>PbCl<sub>x</sub>I<sub>1-x</sub>/Pt device.

Log-scale version of the  $I$ - $V$  characteristics of devices with different active metals

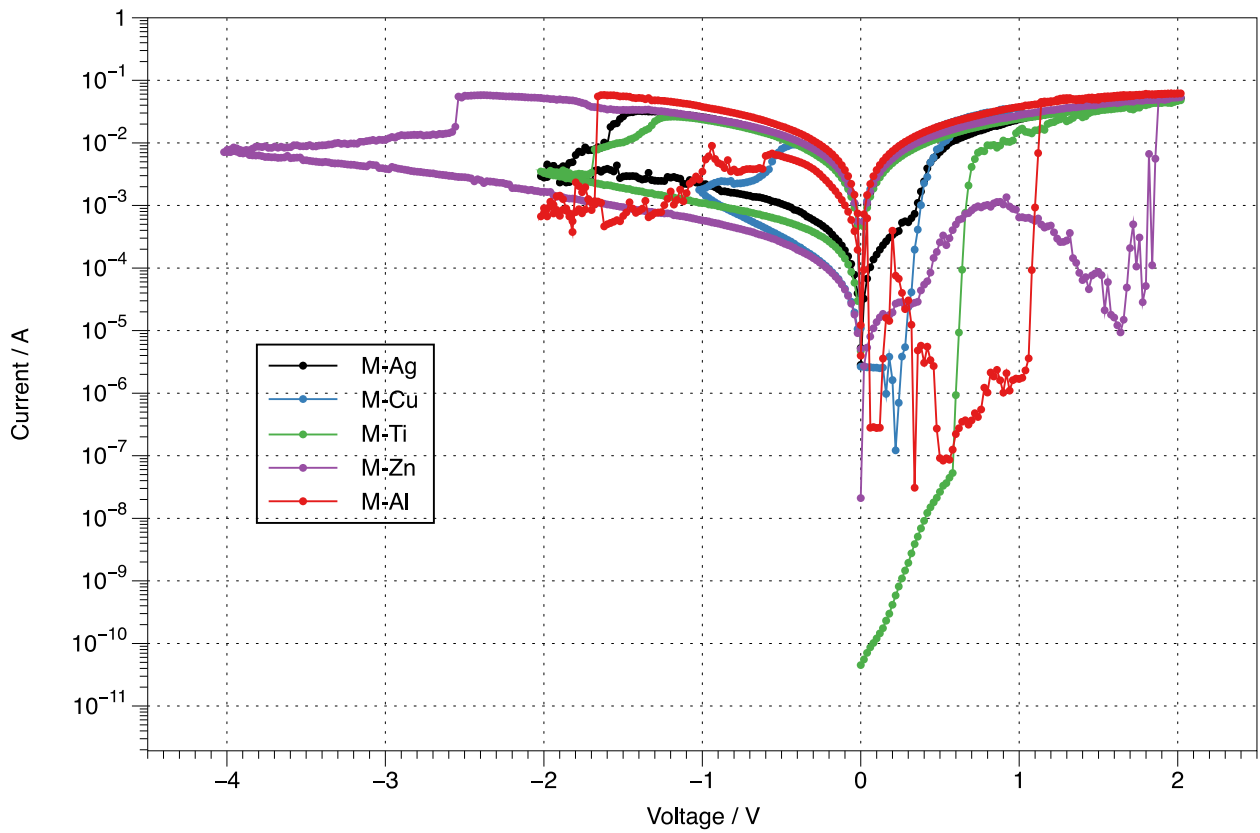

**Figure S2.**  $I$ - $V$  characteristics of FTO/ $\text{CH}_3\text{NH}_3\text{PbCl}_x\text{I}_{1-x}$ /Ag (M-Ag), FTO/ $\text{CH}_3\text{NH}_3\text{PbCl}_x\text{I}_{1-x}$ /Cu (M-Cu), FTO/ $\text{CH}_3\text{NH}_3\text{PbCl}_x\text{I}_{1-x}$ /Ti (M-Ti), FTO/ $\text{CH}_3\text{NH}_3\text{PbCl}_x\text{I}_{1-x}$ /Zn (M-Zn) and FTO/ $\text{CH}_3\text{NH}_3\text{PbCl}_x\text{I}_{1-x}$ /Al (M-Al).

Log-scale version of the  $I$ - $V$  characteristics of the device with  $\text{TiO}_2$  compact layer

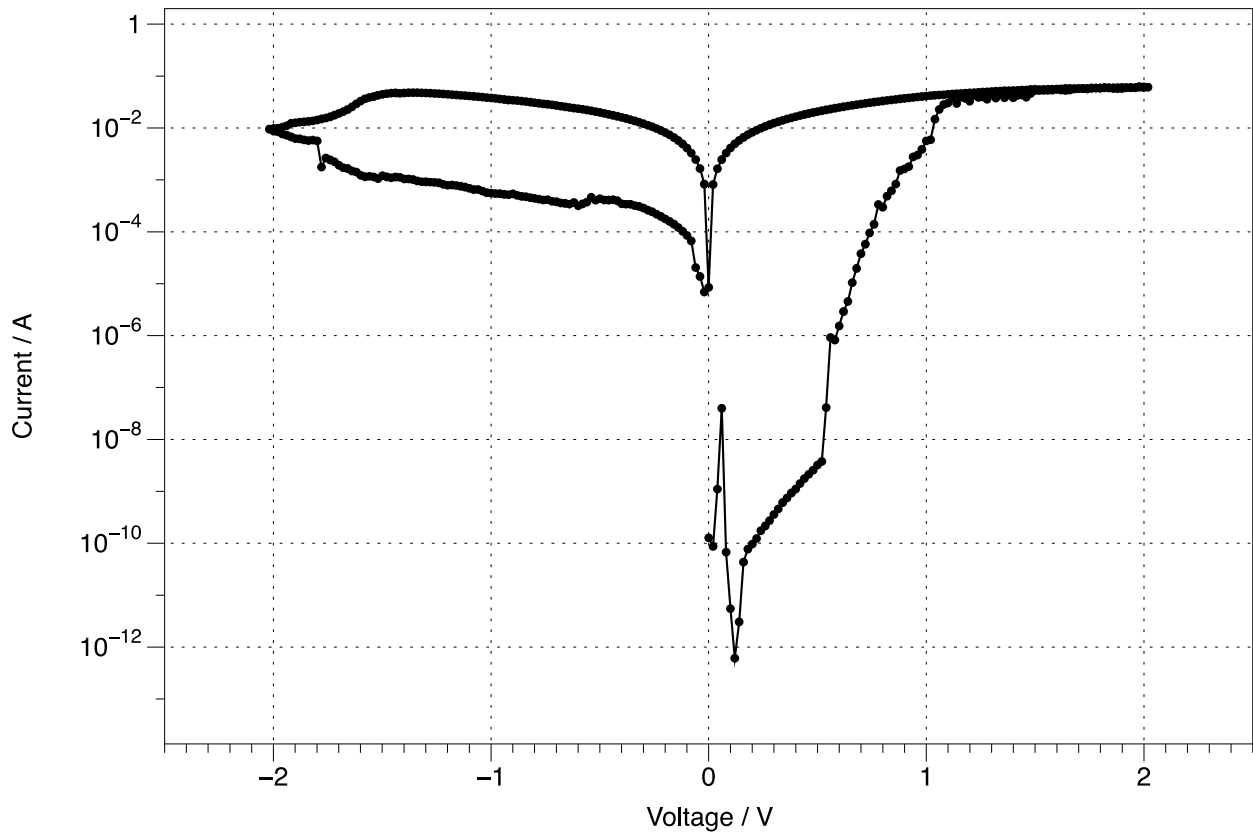

**Figure S3.**  $I$ - $V$  characteristics of FTO/ $\text{TiO}_2$  compact layer/ $\text{CH}_3\text{NH}_3\text{PbCl}_x\text{I}_{1-x}$ /Al.

## Memristive property of TiO<sub>2</sub> compact layer

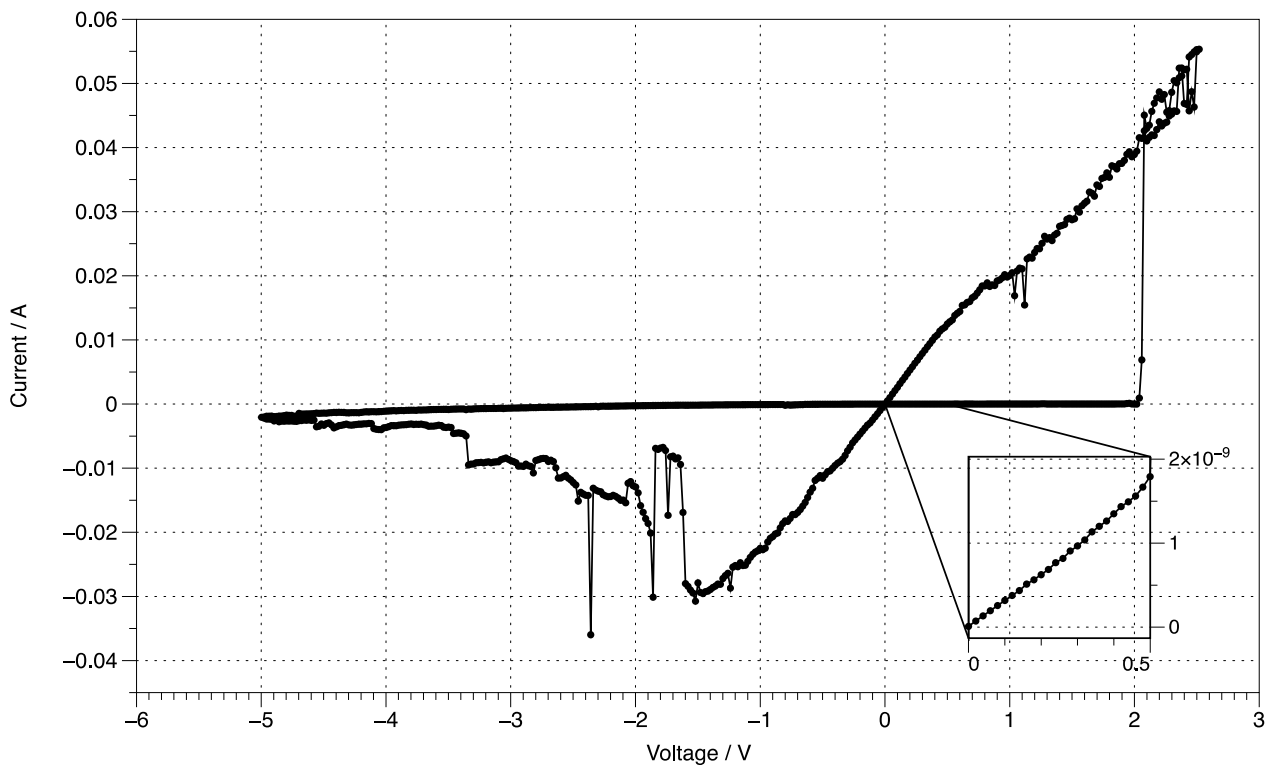

**Figure S4.** *I-V* characteristics of FTO/TiO<sub>2</sub> compact layer/Al.

## Device stability tests

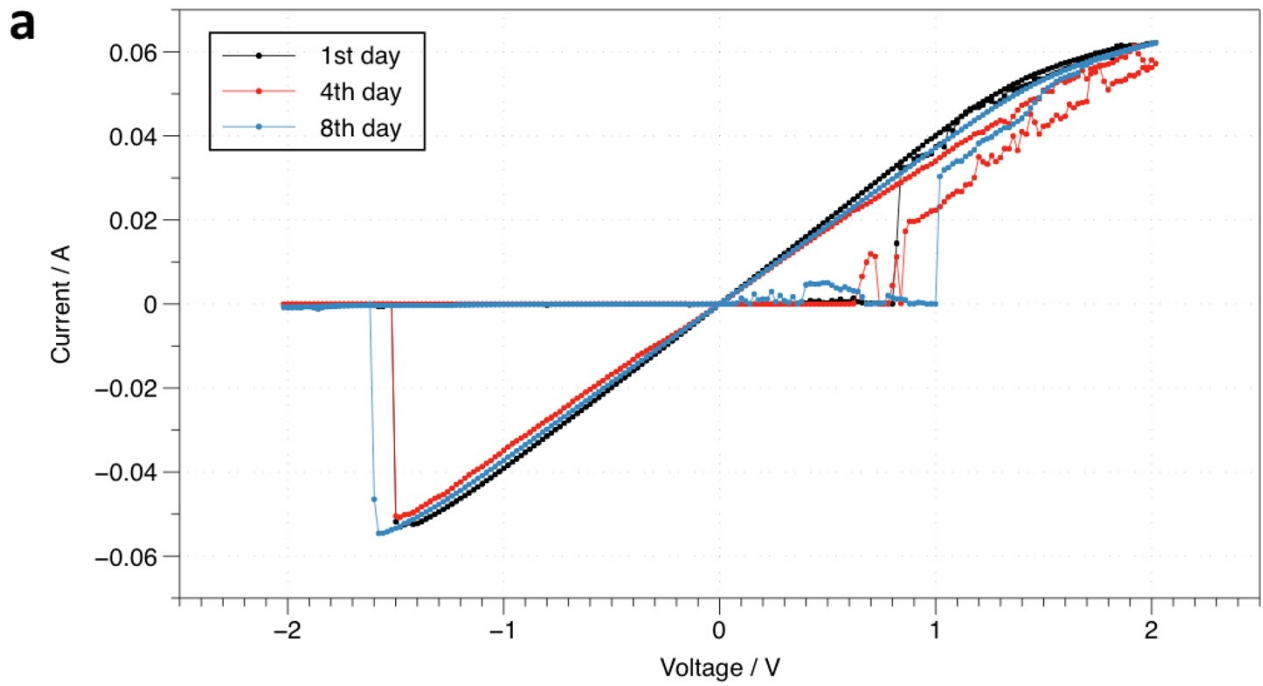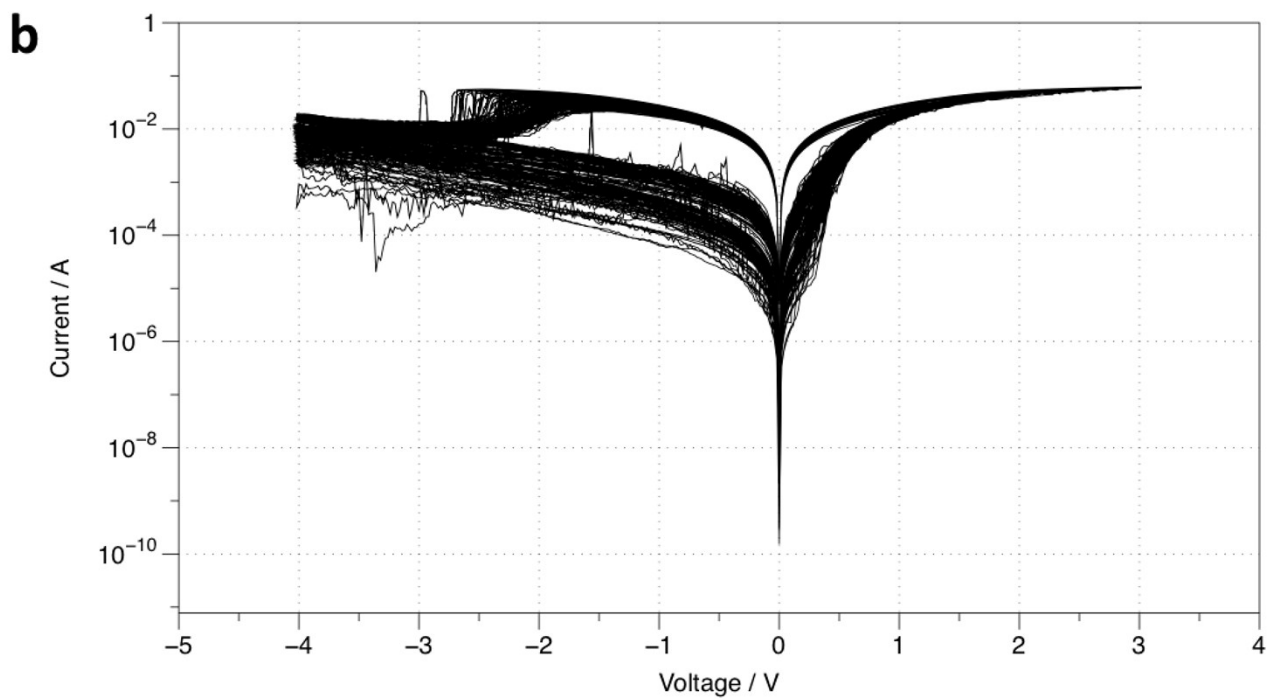

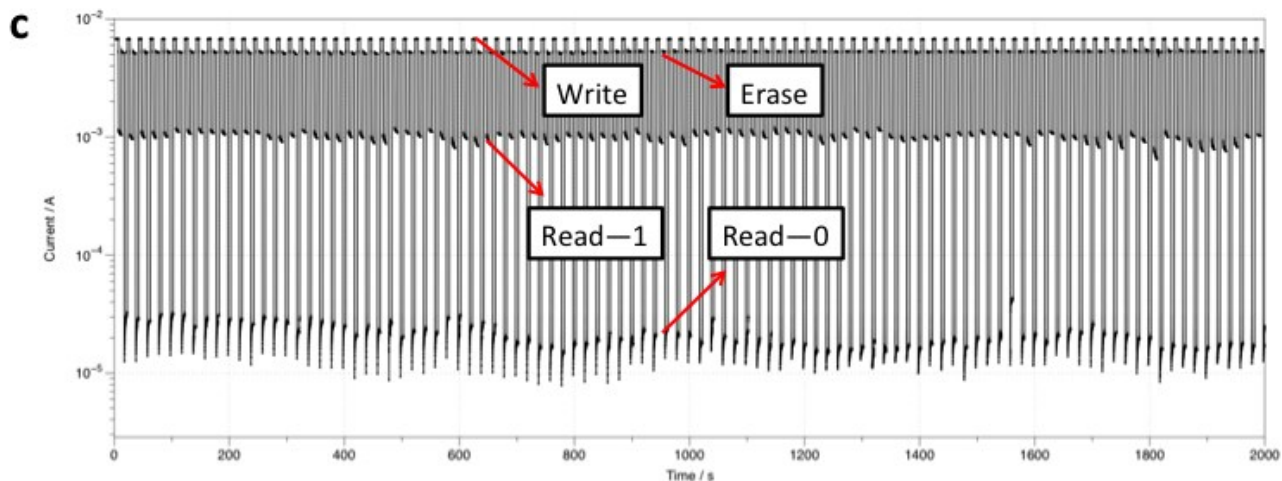

**Figure S5.** Device stability of FTO/CH<sub>3</sub>NH<sub>3</sub>PbCl<sub>x</sub>I<sub>1-x</sub>/Al measured by **a** long-interval  $I$ - $V$  characteristics tests, **b** consecutive  $I$ - $V$  characteristics test (160 times) and **c** pulse-voltage test (write-2V/5s, erase-5V/5s, read-0.05V/5s; 100 times). The device was kept and tested in air without any protection.

## Thickness of the perovskite layer

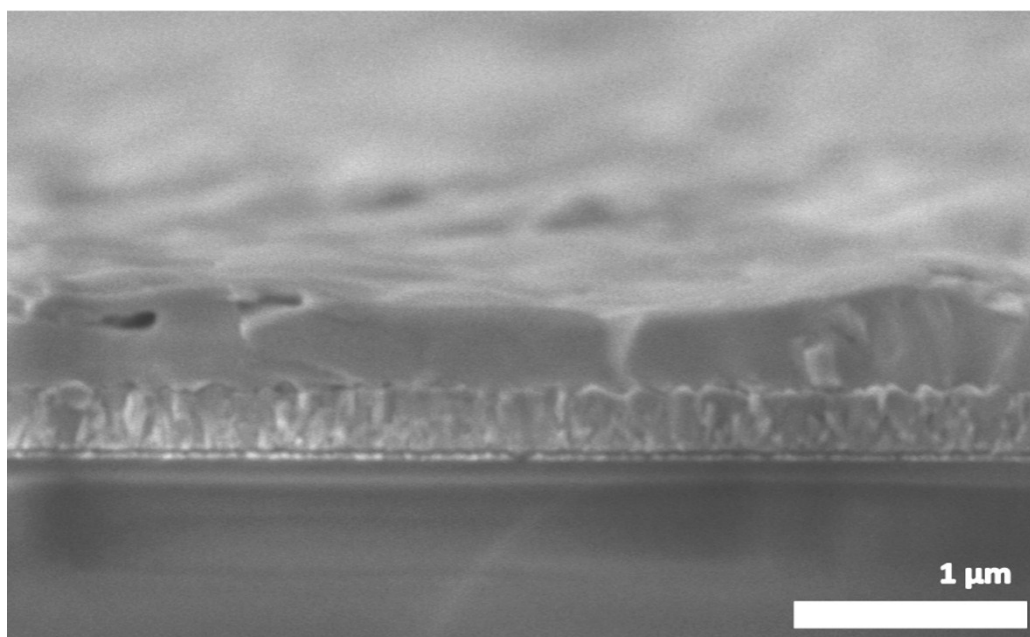

**Figure S6.** Cross-sectional SEM image of FTO/ $\text{CH}_3\text{NH}_3\text{PbCl}_x\text{I}_{1-x}$ .

## The dependence of the on-state resistance on the area of active metal electrode

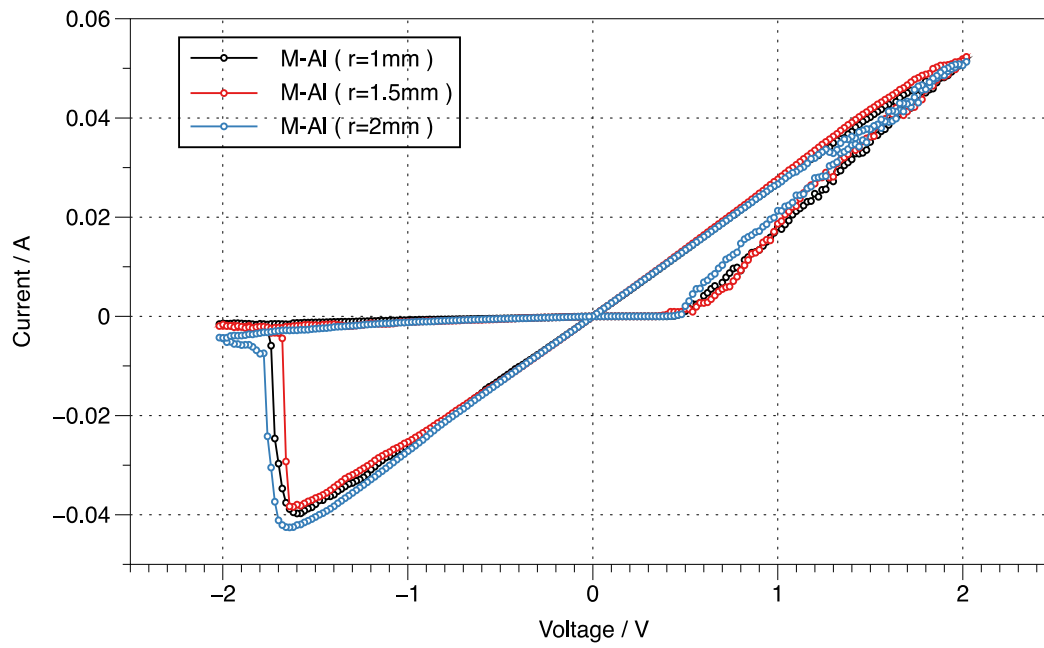

**Figure S7.**  $I$ - $V$  characteristics of FTO/ $\text{CH}_3\text{NH}_3\text{PbCl}_x\text{I}_{1-x}$ /Al with varying areas of Al electrode.
